# Supplementary material for: ANXA11 rs1049550 Associates with Löfgren’s Syndrome and Chronic Sarcoidosis Patients
Source: MDPI journal article supplement (doi:10.3390/cells11091557), 2022-05-05
Supplement: s1 [file s1]

**Supplementary Table S1.** Studies reporting an association of ANXA11 rs1049550 with sarcoidosis disease phenotypes.

| Study                        | T allele Frequency                   |                                     |                                      | OR, 95% CI, <i>p</i> Value *                   |                                                          |                                               |
|------------------------------|--------------------------------------|-------------------------------------|--------------------------------------|------------------------------------------------|----------------------------------------------------------|-----------------------------------------------|
|                              | Control                              | Stage (0)-I                         | Stage II-IV                          | Stage (0)I vs. Controls                        | Stage II-IV vs. Controls                                 | Stage II-IV vs. Stage (0)-I                   |
| Mrazek et al., 2011 [5]      | 0.42 ( <i>n</i> = 254)               | 0.42 ( <i>n</i> = 110)              | 0.30 ( <i>n</i> = 117)               |                                                |                                                          | 0.61 (0.41–0.85) <i>p</i> = 0.01              |
| Levin et al., 2013 * [6]     | 0.18 ( <i>n</i> = 893)               |                                     | Stage IV: ( <i>n</i> = 188)          |                                                | stage IV: 0.85, 0.62–1.16, <i>p</i> = 0.31 <sup>§†</sup> |                                               |
| Feng et al. 2014 [8]         | 0.40 ( <i>n</i> = 418)               | 0.28 ( <i>n</i> = 196)              | 0.37 ( <i>n</i> = 167)               | 0.56, 0.43–0.73, <i>p</i> = 1·10 <sup>-5</sup> | 0.85, 0.65–1.10, <i>p</i> = 0.22                         | 1.51, 1.11–2.07, <i>p</i> = 0.01              |
| Mirsaeidi et al. 2016 * [10] |                                      | 0.10 ( <i>n</i> = 35)               | Stage IV: 0.26 ( <i>n</i> = 17)      |                                                |                                                          | 3.24, 1.09–9.65, <i>p</i> = 0.03              |
| Sikorova et al., 2020 [9]    | <i>n</i> = 100                       | <i>n</i> = 29                       | <i>n</i> = 68                        | 0.69, <i>p</i> = 0.29                          | 0.53, 0.33–0.84, <i>p</i> = 0.01 <sup>†</sup>            |                                               |
|                              | Control                              | Resolving                           | Chronic                              | Resolving vs. Controls                         | Chronic vs. Controls                                     | Chronic vs. Resolving                         |
| Li et al., 2010 [4]          | 0.45 ( <i>n</i> = 313)               | 0.35 ( <i>n</i> = 117)              | 0.34 ( <i>n</i> = 176)               | 0.65, 0.48–0.89, <i>p</i> = 0.007              | 0.62, 0.47–0.81, <i>p</i> = 5·10 <sup>-4</sup>           | 0.95, 0.67–1.34, <i>p</i> = 0.76              |
| Levin et al., 2013 # [6]     | 0.18 ( <i>n</i> = 893)               | <i>n</i> = 304                      | <i>n</i> = 650                       | 0.82, 0.64–1.06, <i>p</i> = 0.13 <sup>§†</sup> | 0.79, 0.65–0.95, <i>p</i> = 0.02 <sup>§†</sup>           |                                               |
| Morais et al., 2013 [7]      | 0.45 ( <i>n</i> = 197)               | 0.34 ( <i>n</i> = 86)               | 0.40 ( <i>n</i> = 62)                | 0.62, 0.43–0.91, <i>p</i> = 0.01               | 0.83, 0.55–1.25, <i>p</i> = 0.37                         | 1.33, 0.82–2.14, <i>p</i> = 0.24              |
| Karakaya et al.              | 0.41 ( <i>n</i> = 363)               | 0.32 ( <i>n</i> = 142)              | 0.26 ( <i>n</i> = 113)               | 0.66, 0.50–0.89, 0.005                         | 0.51, 0.36–0.70, <i>p</i> = 4·10 <sup>-5</sup>           | 0.76, 0.52–1.12, 0.65                         |
|                              | Control                              | Löfgren's Syndrome                  | Non-Löfgren's Syndrome               | Löfgren's Syndrome vs. Controls                | Non-Löfgren's Syndrome vs. Controls                      | Non-Löfgren's Syndrome vs. Löfgren's Syndrome |
| Morais, 2013 [7]             | 0.45 ( <i>n</i> = 197)               | 0.36 ( <i>n</i> = 55)               | 0.32 ( <i>n</i> = 145)               | 0.70, 0.45–1.08, <i>p</i> = 0.11               | 0.57, 0.42–0.78, <i>p</i> = 5·10 <sup>-4</sup>           | 0.81, 0.51–1.29, <i>p</i> = 0.38              |
| Karakaya et al.              | 0.41 ( <i>n</i> = 363)               | 0.33 ( <i>n</i> = 149)              | 0.26 ( <i>n</i> = 113)               | 0.69, 0.52–0.92, <i>p</i> = 0.01               | 0.51, 0.36–0.70, <i>p</i> = 4·10 <sup>-5</sup>           | 0.73, 0.50–1.07, <i>p</i> = 0.11              |
| Mrazek, 2011 [5]             | TT frequency: 0.15 ( <i>n</i> = 254) | TT frequency: 0.21 ( <i>n</i> = 39) | TT frequency: 0.07 ( <i>n</i> = 147) |                                                |                                                          | 0.31, 0.11–0.84, <i>p</i> = 0.02 <sup>†</sup> |

\* Odds ratio (OR), 95% confidence interval (CI) and *p*-values are calculated from the data provided in the original articles.

# Studypopulation: African Americans. For correct presentation the C and T allele are switched.

§ The original article states that the additive genetic model was used to estimate the OR, and the OR is adjusted for sex and percent African ancestry.

† Original data were not available, values are copied from the original article.

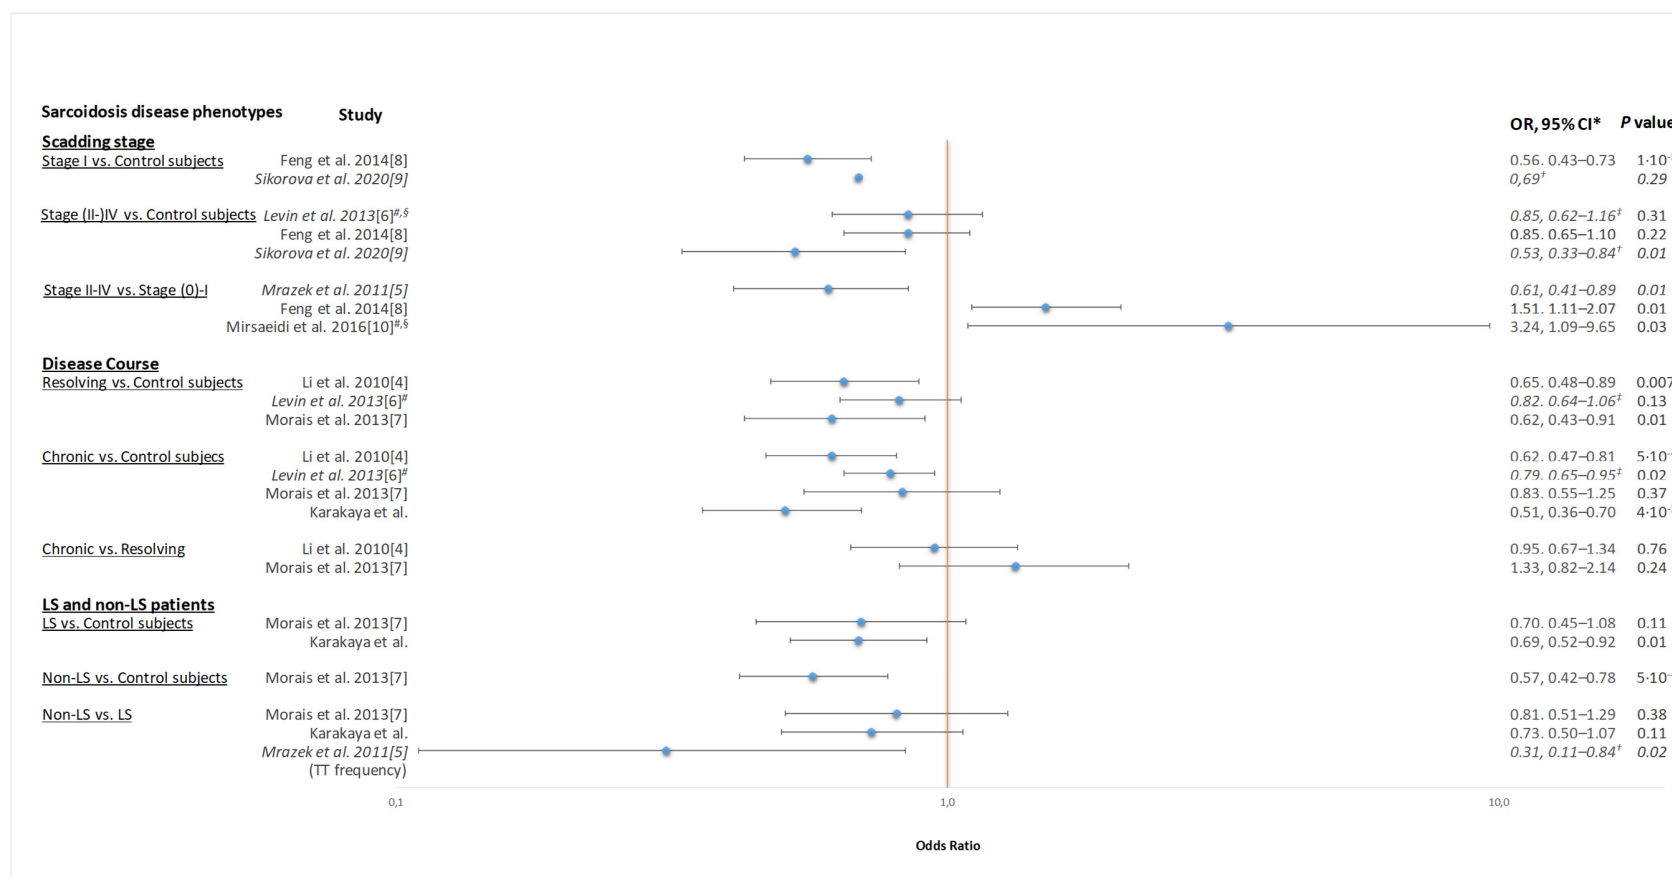

**Supplementary Figure S1.** Forest plot of the results for *ANXA11* rs1049550 T allele associations phenotypes of sarcoidosis.

\* Odds ratio (OR), 95% confidence interval (CI) and p-values are calculated from the data provided in the original articles.

<sup>†</sup> Original data were not available, values are copied from the original article.

<sup>#</sup> Studypopulation: African Americans. For correct presentation the C and T allele are switched.

<sup>§</sup> only Scadding stage IV patients were analyzed.

<sup>‡</sup> The original article states that the additive genetic model was used to estimate the OR, and the OR is adjusted for sex and percent African ancestry.
